1

2 **Variation in maternal mortality in Sidama Regional State, southern Ethiopia: A**  
3 **population based cross sectional household survey**

4

5 **Maternal mortality in Sidama Regional State, southern Ethiopia**

6 Authors

7 Aschenaki Zerihun Kea<sup>1,2\*</sup>, Bernt Lindtjorn<sup>1,2</sup>, Achamyesh Gebretsadik<sup>1</sup>, Sven

8 Gudmund Hinderaker<sup>2</sup>

9 Affiliations

10 <sup>1</sup> *School of Public Health, College of Medicine and Health Science, Hawassa University, Hawassa, Ethiopia*

11 <sup>2</sup> *Centre for International Health, University of Bergen, Bergen, Norway*

12

13 \*Corresponding author

14 Email: [aschenakizer@yahoo.com](mailto:aschenakizer@yahoo.com) (AZK)

15

1

## 16 Abstract

### 17 Introduction

18 Maternal mortality studies conducted at national level do not provide information needed for  
19 planning and monitoring health programs at lower administrative levels. The aim of this study  
20 was to measure maternal mortality, identify risk factors and district level variations in Sidama  
21 Regional State, southern Ethiopia.

### 22 Methods

23 A cross sectional population-based survey was carried in households where a woman reported  
24 pregnancy and birth outcomes in the past five year. The study was conducted in the Sidama  
25 Regional State, southern Ethiopia, from July 2019 to May 2020. Multi-stage cluster sampling  
26 technique was employed. The outcome variable of the study was maternal mortality. Complex  
27 sample logistic regression analysis was applied to assess variables independently associated  
28 with maternal mortality.

### 29 Results

30 We registered 10602 live births (LB) and 48 maternal deaths yielding the overall maternal  
31 mortality ratio (MMR) of 419; 95% CI: 260-577 per 100,000 LB. Aroresa districts had the  
32 highest MMR with 1142 (95% CI: 693-1591) per 100,000 LB. Leading causes of death were  
33 haemorrhage 21 (41%) and eclampsia 10 (27%). Thirty (59%) mothers died during labour or  
34 with 24 hours after delivery, 25 (47%) died at home and 17 (38%) at health facility. Mothers  
35 who did not have formal education had higher risk of maternal death (AOR: 4.3; 95% CI: 2.0 –

36 9.2). The risk of maternal death was higher in districts with low midwife to population ratio  
37 (AOR: 3.0; 95% CI: 1.2-7.9).

## 38 Conclusion

39 The high maternal mortality with district level variations in Sidama region highlights the  
40 importance of improving obstetric care and employing targeted interventions in areas with high  
41 mortality rates. Due attention should be given to improving access to female education.  
42 Additional midwives has to be trained and deployed to improve maternal health services and  
43 consequently save the life of mothers.

## 44 Introduction

45 Ethiopia is the second most populous country in Africa having more than 110 million people [1]  
46 constituted by 11 regional states and 670 districts. Improving maternal health and  
47 consequently decrease maternal mortality is one of the important agenda for the government  
48 [2]. To improve maternal health and reduce maternal deaths, accurate data on maternal  
49 mortality should come from studies conducted at subnational level. However; the country's  
50 maternal mortality data mainly comes from studies carried out at national level [3, 4]. National  
51 maternal mortality estimates may not provide sufficient details to understand the distribution  
52 of maternal deaths at local levels relevant for health planning and monitoring. Hence, sub-  
53 national maternal mortality estimates are needed for program monitoring and local decision  
54 making.

55 To understand the distribution of maternal deaths at local level and improve the monitoring of  
56 the progress towards reducing maternal deaths, maternal deaths need to be accurately  
57 counted and the likely causes identified [5-7]. However, most developing countries do not have  
58 systems at national or sub-national level to register vital events including maternal deaths [8-  
59 10]. In areas without a vital registration system, maternal deaths can be measured through  
60 population based household surveys [11].

61 Most maternal deaths occur during labour, delivery or within 42 days postpartum. Important  
62 causes are obstetric haemorrhage, infections and hypertensive disorders of pregnancy [12].

63 Most of these deaths can be avoided through cost effective interventions including skilled birth  
64 attendance [13-15]. In countries with many maternal deaths, the coverage and usage of  
65 essential interventions is low, if available, often provided with poor quality, with a persisting  
66 gap between the rich versus the poor, and urban versus rural populations [16]. The Sustainable  
67 Development Goal (SDG) aims at reducing MMR to less than 70 per 100,000 live births (LB) by  
68 2030, but this will not be achieved if universal coverage for essential interventions are not  
69 improved [5].

70 In Ethiopia the maternal mortality ratio (MMR) was reduced from 1030 in 2000 to 401 in 2017  
71 per 100,000 LB [4]. Despite these improvements, still many mothers die [4]. The 2016 Ethiopia  
72 Demographic and Health Survey (DHS) reported a MMR 412 per 100, 000 LB [3]. Despite the  
73 prevailing problem, measuring maternal mortality remains a challenge in Ethiopia as the  
74 country lacks functional vital registration system [7]. Well organized household surveys, using  
75 large and representative samples with verbal autopsy (VA) can provide information on local  
76 distribution and causes of maternal deaths.

77 To the best of our knowledge, there have been few studies describing maternal mortality  
78 estimates at sub-national and district level in the country. Population based studies conducted  
79 in south-west Ethiopia [17] and northern Ethiopia [18] found a MMR of 425 and 266 per  
80 100,000 LB respectively. We carried out this study in the Sidama Regional State, southern  
81 Ethiopia with the following specific objectives: 1) measure the maternal mortality ratio; 2)  
82 measure variations of maternal mortality ratio at district level; 3) assess determinants of  
83 maternal deaths.

84 This study could provide essential information to improve maternal health services relevant for  
85 lifesaving comprehensive emergency obstetric care in Sidama Regional State. Furthermore, it  
86 will provide important information to the region used for priority setting and resource  
87 allocation identifying areas with high rates of maternal mortality. Therefore, this study can also  
88 inform other regional states in the country to carry out similar studies to understand the  
89 magnitude and variations in maternal mortality to improve maternal health care. The  
90 information from this study will help the design of maternal health programs at large which  
91 support the country's effort towards attaining the SDG.

## 92 **Methods and materials**

### 93 **Study design and setting**

94 We used a cross sectional study design employing population-based survey in households that  
95 reported pregnancy and birth outcomes in the past five years (July 2014-June 2019). The study  
96 was conducted in six districts (Aleta Chuko, Aleta Wondo, Aroresa, Daela, Hawassa Zuriya and  
97 Wondogenet) of Sidama Regional State, southern Ethiopia from July 2019 to May 2020 (Fig 1).

98 Sidama Regional State is one of the 11 regional states in Ethiopia. The region had a population  
99 of 4.3 million people in 2020 [19] and administratively divided into 30 rural districts (*woredas*),  
100 6 town administrations and 536 rural *kebeles* (the smallest administrative structure with  
101 average population of 5000). Under the *kebele*, there are local structures known as *limatbudin*  
102 (administrative unit organized by 40-50 neighbouring households)

103 The region has 18 hospitals (13 primary, 4 general and 1 tertiary ), 137 health centres and 553  
104 health posts operated by the government [20]. In the region, there are also 4 hospitals (1  
105 general and 3 primary), 21 speciality and higher clinics, 131 medium clinics and 79 primary  
106 clinics run by private owners. The health centres provide basic emergency obstetric and new  
107 born care (BEmONC) whereas hospitals are responsible for comprehensive obstetric and new  
108 born care (CEmONC) in addition to the BEmONC [21].

109 **Fig 1. Map of study districts in Sidama Regional State, Ethiopia, 2020.**

110

### 111 Background characteristics of study districts

112 Table 1 summarizes the background characteristics of the six districts included in the study.

113 Daela and Wondogenet districts did not have a hospital. Doctor to population ratio in Aroresa  
114 district was about 1 per 26000 while there were no doctors in Daela and Wondogenet districts.

115 The midwife to population ratio was 1 per 6200 in Hawassa Zuriya district whereas 1 per 52000  
116 in Aroresa district and 1 per 45900 in Daela district. Hawassa Zuriya is the nearest district, 21  
117 kilometre distant from the regional capital, Hawassa, whereas Aroresa is the farthest district  
118 situated 181 kilometre away from Hawassa.

119 **Table1.** Background characteristics of study districts, Sidama regional state, southern  
120 Ethiopia, 2020.

|                                                         | Districts       |                 |             |              |                    |                 |
|---------------------------------------------------------|-----------------|-----------------|-------------|--------------|--------------------|-----------------|
|                                                         | Aleta-<br>Chuko | Aleta-<br>Wondo | Aroresa     | Daela        | Hawassa-<br>Zuriya | Wondo-<br>genet |
| Total population                                        | 212,721         | 246,556         | 104,006     | 45,938       | 168,186            | 171,291         |
| Estimated births (3.46%)                                | 7360            | 8530            | 3599        | 1589         | 5819               | 5927            |
| Primary hospital available (Number)                     | 1               | 1               | 1           | 0            | 1                  | 0               |
| Health centre available (Number)                        | 7               | 7               | 5           | 1            | 4                  | 5               |
| Primary hospital to population ratio*                   | 1:212721        | 1:246556        | 1:104006    | No hospital  | 1:168186           | No hospital     |
| Health centre to population ratio**                     | 1:30389         | 1:35222         | 1:20801     | 1:45938      | 1:42047            | 1:34258         |
| Additional primary hospital needed                      | 1               | 2               | 0           | 1            | 1                  | 2               |
| Additional health centre needed                         | 2               | 3               | -1          | 1            | 3                  | 2               |
| Number of midwives available                            | 24              | 26              | 2           | 1            | 27                 | 8               |
| Number of doctors available                             | 10              | 13              | 4           | 0            | 14                 | 0               |
| Midwife to population ratio***                          | 1 per 8863      | 1 per 9483      | 1 per 52003 | 1:45938      | 1 per 6229         | 1 per 21411     |
| Doctor to population ratio****                          | 1 per 21272     | 1 per 18966     | 1 per 26002 | No physician | 1 per 12013        | No physician    |
| Additional midwives needed<br>(number)                  | 19              | 23              | 19          | 8            | 7                  | 26              |
| Additional doctors needed (number)                      | 11              | 12              | 6           | 5            | 3                  | 17              |
| Average distance from<br>regional capital, Hawassa (km) | 61km            | 64km            | 181km       | 175km        | 21km               | 25km            |

Note: Ideal population-to-facility ratios \* 1:100,000, \*\* 1:25,000, \*\*\* 1:5000, \*\*\*\* 1:10000, km: kilometre  
Source: Sidama regional health bureau human resource development annual report, 2020, (unpublished).

121

## 122 Study population and sampling technique

123 All women who experienced pregnancy and birth outcomes in the past five year in Sidama  
124 Regional State were the source population. Women residing in a sampled households and who  
125 had pregnancy and birth outcomes (live births, stillbirths and neonatal deaths) in the past five  
126 year preceding the survey were the study population.

127 Fig. 2 shows the sampling strategy of the study. We followed multistage cluster sampling  
128 technique to select the study population. In first stage, we listed all the 30 rural districts of the  
129 region with unique identification code. Then, we selected 6 districts (20% of the districts) by  
130 simple random sampling. At the second stage, we listed all the *kebeles* in the 6 districts and  
131 randomly selected 40 *kebeles* proportional to the size of the *kebeles* in the districts. We  
132 employed complex sampling technique and used seed number (245987) in statistical package  
133 for social science (SPSS) to generate the sample of *kebeles*.

134 In third stage, we listed all the *limatbudins* for each of the selected *kebele* and randomly  
135 selected 6 *limatbudins* from each *kebele*; altogether 240 *limatbudins* from the 40 *kebeles*. To  
136 identify a mother who experienced pregnancy and pregnancy outcomes in the past five year,  
137 we visited all the households in the selected *limatbudins* and listed all the households that  
138 reported births in the past five year. Finally, we selected 37 households from each *limatbudin*;  
139 which amounts a total 8880 households from 240 *limatbudins*.

140 **Fig 2. Schematic diagram sampling techniques, Sidama Regional State, Ethiopia, 2020.**

141

## 142 Variables

143 Maternal mortality was the outcome measurement of the study. Explanatory variables were as  
144 follows: educational level of mother, educational level of husband, road type used to reach the  
145 nearest health facility, distance to the nearest health centre, distance to the nearest hospital,  
146 occupation of household head, number of births given in past five year, family size, wealth



147 index, hospital to population ratio, health centre to population ratio, doctor to population ratio  
148 and midwife to population ratio.

149 The geographic locations of households, the nearest health centres and the nearest hospitals  
150 were mapped with a global positioning system (GPS) receiver by data collectors who visited all  
151 the sampled households during data collection. Traveling time by walking to the nearest  
152 hospital was assessed by the data collectors based on reports from the respondents.

153 Data on number of hospitals, health centres, doctors and midwives of the sampled districts was  
154 obtained from Sidama Regional Health Bureau Human Resource department (unpublished).

155 Wealth index was created using 15 household asset variables [17] broadly categorized in five  
156 groups: assets owned (radio, mobile phone and motorbike), livestock owned (cattle, horse or  
157 mule or donkey and sheep or goat), housing characteristics and utilities (flooring materials,  
158 roofing materials, number of rooms used for sleeping, source of drinking water, type of toilet  
159 facilities, access to electricity and use of kerosene lamp), cash crop grown and ownership of  
160 horse or mule used for transportation. Household utilities and asset variables used for  
161 household wealth index creation are presented in S1 Table. Type of road to the nearest health  
162 facility was obtained from the report of participant interview.

## 163 Definitions

164 **Maternal death:** A death of a woman while pregnant or within 42 days of termination of  
165 pregnancy, irrespective of the duration and site of the pregnancy, from any cause related to or  
166 aggravated by the pregnancy or its management, but not from accidental or incidental causes;  
167 International classification of diseases and related health problems (ICD-10) [22].

168 **Late maternal death:** A death of a woman from direct or indirect obstetric causes, more than  
169 42 days but less than one year after termination of pregnancy [22].

170 **Comprehensive maternal death:** A grouping that combines both early and late maternal deaths  
171 (ICD-11) [23].

172 **Maternal mortality ratio (MMR):** Is the number of maternal deaths during a given time period  
173 per 100,000 live births during the same time period.

174 **Verbal autopsy for maternal health:** A method of finding out the medical causes of death and  
175 ascertaining factors that may have contributed to the death in women who died outside of a  
176 medical facility. The VA consists of interviewing people who know about the events leading to  
177 the death such as family members, neighbours and traditional birth attendants [24].

## 178 Data sources and measurement

179 The data was collected from households that reported pregnancy and pregnancy outcomes in  
180 the past five years. In households which did not have maternal deaths, a mother was  
181 interviewed about her pregnancy experiences and household characteristics using interviewer  
182 administered questionnaire. When a mother was absent during the initial visit, the data  
183 collectors revisited the household the next day. The data was collected by diploma level  
184 teachers recruited from each kebele.

185 In a household where maternal death occurred, we interviewed a father or any adult  
186 knowledgeable about the death of mother. The data was obtained through administering VA  
187 questions adapted from the WHO manual for maternal death [25]. Two public health officers

188 who were familiar with the language and culture of study area independently conducted the VA  
189 interview. The VA interviewers determined the cause of death using pre-coded options of  
190 major causes of maternal deaths: bleeding (haemorrhage), fever (sepsis), convulsion  
191 (hypertension), prolonged or obstructed labour and including the option of other causes[22].

## 192 Data quality control

193 The questionnaire was developed after reviewing similar studies. Initially, the questionnaire  
194 was prepared in English, translated into local language (*Sidaamu Afoo*) and then back translated  
195 to English by another individual. VA interview questions were adapted from the World Health  
196 Organization (WHO) VA guideline [25]. We used the WHO ICD-10 guideline for the  
197 ascertainment of causes of maternal deaths [22].

198 Inter-rater agreement between the two VA interviewers while ascertaining the cause of  
199 maternal deaths was assessed by kappa statistic. We used the Landis and Koch inter-rater  
200 reliability classification to interpret the kappa coefficient:  $\leq 0.4$ : poor to fair;  $>0.4-\leq 0.6$ :  
201 moderate agreement,  $>0.6-0.8$ : substantial agreement and  $>0.8$ -high agreement [26]. The  
202 computed Kappa statistics test result was  $Kappa = 0.75$  (95% CI: (0.62-0.87) which indicates  
203 substantial agreement between the two VA interviewers.

204 Internal consistency of the variables used for wealth index creations was determined using  
205 Cronbach's Alpha reliability statistics which was found 0.54 and the sampling adequacy was  
206 assessed by Kaiser-Meyer-Olkin test with test result of 0.64.

207 The data collectors, the supervisors and VA interviewers were given training by the principal  
208 investigator. Key terms and concepts were translated into local terms during the training. The  
209 questionnaire was pretested in one district not included in the survey.

210 The supervisors followed the data collectors, checked consistency and completeness of the  
211 questionnaire on daily basis. The data was double entered and validated using EpiData version  
212 3.1 software (EpiData Association 2000-2021, Denmark).

### 213 **Sample size estimation**

214 Sample size estimation for the survey was determined based on the following assumptions:  
215 MMR of 412/100,000 LB, crude birth rate of 32 per 1000 population and average household  
216 size of 4.6 [3]. With the assumption of a MMR of 412 per 100,000 LB, design effect of 2 and 14%  
217 precision level, the needed sample was 15496 LB. From a population of 100,000 people and  
218 assumed crude birth rate of 32 per 1000 people, we would have  $(32/1000 * 100000)$  3200 LB per  
219 year (16000 LB in 5 year). Hence, we expected to observe 66 maternal deaths over five year  
220 among 16000 LB with 95% confidence interval of MMR; (324-524) per 100,000 LB [27].

221 We assumed that two LB would occur in one household over a five-year period [17] and hence  
222 8000 households would be visited to get the 16000 LB. By considering 10% non-response, the  
223 final households estimated for the survey were 8800 households. We used OpenEpi software  
224 to calculate the sample size (Source Epidemiologic Statistics for Public Health version 3.01,  
225 [www.OpenEpi.com](http://www.OpenEpi.com)) [27].

## 226 Statistical analysis

227 We used Stata version 15 for data analysis (Stata Corp., LLC. College Station, Texas, USA). This  
228 study used data obtained through multistage cluster sampling design [28, 29]. To account for  
229 the sampling design, we employed complex survey data analysis method with sampling weight  
230 adjusted for non-response [28, 30]. The sampling weight was employed to correct for unequal  
231 probability of selection so that to produce meaningful estimates which correspond to the  
232 population of interest [31].

233 This study had four sampling units: district, *kebele*, *limatbudin* and household. In primary  
234 sampling unit, we applied similar sampling weight since the districts were selected with equal  
235 probability of selection. However, the *kebeles*, *limatbudin* and households were selected with  
236 different selection probability at their respective levels and hence we computed the sampling  
237 weight for each of them that differ according to their sampling probability.

238 We computed sampling weight adjusted for non-response by using three steps stated below  
239 [30]. We initially calculated the sampling weight for each sampling unit. The sampling weight  
240 was computed as the inverse of selection probability. Secondly, we adjusted for non-response  
241 for each sampling unit. Nonresponse was calculated as the inverse of response rate. Finally, we  
242 calculated sampling weight adjusted for non-response by multiplying the inverse of sampling  
243 probability (inverse of inclusion probability) with the inverse of response rate at each sampling  
244 unit [30].

245 We also estimated finite population correction (FPC) factor for each sampling unit to adjust for  
246 variance estimators as the survey data was sampled from finite population without

247 replacement [32]. The FPC was calculated using the following formula where N is population  
248 and n is sample:

$$249 \quad \text{FPC} = \sqrt{(N-n) / (N-1)}$$

250 Principal component analysis (PCA) was computed to create wealth index. We categorized the  
251 wealth index using the first principal component with eigenvalue of 2.3 that explained 15.2 % of  
252 the total variance.

253 We used geographic coordinates of households, the nearest health centres and hospitals to  
254 calculate distance between them. We calculated straight-line distances using proximity analysis  
255 “generate near table function” in ArcGIS 10.4.1 [33] and exported the data to Stata 15 for  
256 further analysis. Walking time to the nearest hospital according to the participants’ report was  
257 also used.

258 We did descriptive statistics like mean, proportions and ratios. Chi-square test was computed  
259 to test the association between the outcome variable and potential explanatory variables.

260 Complex sample logistic regression analysis was used to measure the effect of explanatory  
261 variables with maternal mortality. We carried out both weighted and non-weighted analysis,  
262 but reported only weighted analysis.

## 263 Ethical approval

264 The ethical approval for this study was obtained from institutional review board of Hawassa  
265 University College of Medicine and Health Sciences (IRB/015/11) and Regional Ethical  
266 Committee of Western Norway (2018/2389/REK vest). Support letter to respective *woreda*

267 health offices was obtained from Sidama Regional Health Bureau (formerly known Sidama Zone  
268 Health Department). Letter of permission to respective *kebeles* was sought from each *woreda*  
269 health office.

270 Informed written (thumb print and signed) consent was obtained from the study participant  
271 before interview. Participant identifiers were anonymized during data entry and analysis to  
272 maintain confidentiality of the participants.

## 273 Results

### 274 Background characteristics of study population

275 Table 2 shows background characteristics of the study participants. In this study we interviewed  
276 8755 participants out of 8880 households visited, with response rate of 98.6%. On average  
277 there were 5 persons (ranging 1-14 persons) per household. Concerning educational status,  
278 2304 (24.3%) of the mothers and 1467 (15.7%) of the husbands had no formal education.  
279 Subsistence farming was the main occupation for 6332 (71.8 %) head of the households. To  
280 access the nearest hospital, 7653 (89.6%) of the families needed more than an hour of walking.  
281 The nearest health centre for 8050 (93.3%) of households was found within 5km, while the nearest  
282 hospital for 6440 (77.7%) households was found within 10km.

283

284

285



286 **Table 2.** Background characteristics of study participants, Sidama Regional State,  
 287 southern Ethiopia, 2020.

| <b>Variable</b>                                     | <b>Unweighted<br/>(Number, %)</b> | <b>Weighted** %</b> |
|-----------------------------------------------------|-----------------------------------|---------------------|
| Total visited households                            | 8755 (98.6)                       |                     |
| <b>Educational level of mother</b>                  |                                   |                     |
| No formal education                                 | 2304 (26.3)                       | 24.3                |
| Lower primary school (Grade 1-4)                    | 2672 (30.5)                       | 31                  |
| Upper primary school (Grade 5-8)                    | 2926 (33.4)                       | 34.3                |
| High school or above                                | 853 (9.7)                         | 10.3                |
| <b>Educational level of husband</b>                 |                                   |                     |
| No formal education                                 | 1467 (16.8)                       | 15.7                |
| Lower primary school (Grade 1-4)                    | 1822 (20.8)                       | 20.9                |
| Upper primary school (Grade 5-8)                    | 3782 (43.2)                       | 43.8                |
| High school or above                                | 1684 (19.2)                       | 19.6                |
| <b>Main occupation of head of the household</b>     |                                   |                     |
| Subsistence farming                                 | 6332 (72.3)                       | 71.8                |
| Not farming*                                        | 2423 (27.7)                       | 28.2                |
| <b>Wealth quantile of household</b>                 |                                   |                     |
| Lowest                                              | 3510 (40.1)                       | 43.5                |
| Middle                                              | 1749 (20.0)                       | 19                  |
| Highest                                             | 3496 (39.9)                       | 34.5                |
| <b>Road facility to the nearest health facility</b> |                                   |                     |
| Concrete                                            | 741 (8.5)                         | 7.1                 |
| All weather road                                    | 4618 (52.7)                       | 54.8                |
| Dry weather road                                    | 3153 (36.0)                       | 35.7                |
| No motorized road: no (%)                           | 243 (2.8)                         | 2.4                 |
| <b>Walking time to nearest hospital</b>             |                                   |                     |
| Less than one hour                                  | 1102 (12.6)                       | 10.4                |
| 1hour -2hour                                        | 4566 (52.2)                       | 56.1                |
| 2hour-4 hour                                        | 2464 (28.1)                       | 27.1                |
| Above 4 hour                                        | 623 (7.1)                         | 6.4                 |
| <b>Distance to the nearest HC</b>                   |                                   |                     |
| <=4.9Km                                             | 8050 (91.9)                       | 93.3                |
| >=5Km                                               | 705 (8.1)                         | 6.7                 |
| <b>Distance to the nearest HO</b>                   |                                   |                     |
| <=9.9Km                                             | 6440 (73.6)                       | 77.7                |
| >=10Km                                              | 2315 (26.4)                       | 22.3                |

Note: \* Includes small scale trade and government employed, \*\* Non-response adjusted sampling weight, HC: Health centre, HO: Hospital, Km: Kilometre

## 289 Place and assistance during delivery

290 Table 3 shows place and assistance of delivery. We identified a total of 10851 births: 10602 (LB)  
291 and 249 stillbirths. On average, there were 1.2 births in a household, and 56.2% of the births  
292 took place at home. Traditional birth attendants (TBAs) assisted 18.3% of the births, 38.0%  
293 were assisted by family or neighbour and 43.2% were assisted by skilled health personnel.

294 **Table 3.** Place and assistance during delivery, Sidama Regional State, southern Ethiopia,  
295 2020.

| <b>Total births* (N=10851)</b>    | <b>Unweighted (Number, %)</b> | <b>Weighted **%</b> |
|-----------------------------------|-------------------------------|---------------------|
| Birth place                       |                               |                     |
| Home                              | 6406 (59.0)                   | 56.2                |
| Health Post                       | 62 (0.6)                      | 0.5                 |
| Health Centre                     | 3025 (27.9)                   | 30.0                |
| Hospital                          | 1318 (12.1)                   | 12.8                |
| Private Clinic or Hospital        | 40 (0.4)                      | 0.5                 |
| Attendant of Delivery             |                               |                     |
| Traditional birth attendant       | 1851 (17.0)                   | 18.3                |
| Health Extension Worker           | 62 (0.6)                      | 0.5                 |
| Family or Neighbour               | 4555 (42.0)                   | 38.0                |
| Nurse or Doctor or Health Officer | 4383 (40.4)                   | 43.2                |

Note: \* Includes live births and stillbirth, \*\* Non-response adjusted sampling weight

296

## 297 Characteristics of deceased mothers

298 Table 4 describes characteristics of deceased mothers. The mean age of deceased mothers was  
299 29 years. Twenty two (47%) of the deaths occurred in the 25-29 age group. Twenty eight (55%)  
300 of deceased mother had no formal education, 38 (84%) were house wives, 40 (80 %) were  
301 multiparous, 32 (67%) had pregnancy related complaints, 22 (50%) attended antenatal care  
302 (ANC) and from those who had ANC check-up, 5 (24 %) attended four or more ANC visits.

303 Twenty-four (59%) of deceased mothers gave birth at home from which 10 (21%) were assisted  
304 by TBA and 14 (38%) were assisted by family or neighbours.

305

306

307

308

309

310

311

312

313

314

315

316

317

318

319 **Table 4.** Characteristics of deceased mothers, Sidama Regional State, southern Ethiopia,  
 320 2020.

| <b>Variables</b>                                | <b>Unweighted<br/>Number (%)</b> | <b>Weighted* %</b> |
|-------------------------------------------------|----------------------------------|--------------------|
| All deceased mothers                            | 48 (100)                         |                    |
| <b>Age group (years)</b>                        |                                  |                    |
| 20-24                                           | 3 (6)                            | 7                  |
| 25-29                                           | 22 (46)                          | 47                 |
| 30-34                                           | 15 (31)                          | 30                 |
| 35-39                                           | 6 (13)                           | 11                 |
| 40-44                                           | 2 (4)                            | 4                  |
| 45-49                                           | 0 (0)                            | 0                  |
| <b>Education level</b>                          |                                  |                    |
| No formal education (number, %)                 | 28 (58)                          | 55                 |
| Formal education (number, %)                    | 20 (42)                          | 45                 |
| <b>Occupation</b>                               |                                  |                    |
| House wife                                      | 38 (79)                          | 84                 |
| Subsistence farming                             | 10 (21)                          | 16                 |
| <b>Parity</b>                                   |                                  |                    |
| Nulliparous                                     | 8 (17)                           | 20                 |
| Multipara                                       | 40 (83)                          | 80                 |
| <b>Complaints in the last three months</b>      |                                  |                    |
| Had complaints                                  | 32 (67)                          | 67                 |
| Did not have complaints                         | 16 (33)                          | 33                 |
| <b>ANC attendance</b>                           |                                  |                    |
| Attended ANC                                    | 22 (46)                          | 50                 |
| Did not attend ANC                              | 26 (54)                          | 50                 |
| <b>Number of ANC (N=22)</b>                     |                                  |                    |
| <=3                                             | 17 (77)                          | 76                 |
| >=4                                             | 5 (23)                           | 24                 |
| <b>Place of delivery while died (N=37)</b>      |                                  |                    |
| Home                                            | 24 (65 %)                        | 59                 |
| Health centre                                   | 5 (13 %)                         | 16                 |
| Hospital                                        | 8 (22 %)                         | 25                 |
| <b>Assistance of delivery while died (N=37)</b> |                                  |                    |
| TBA                                             | 10 (27 %)                        | 21                 |
| Family                                          | 9 (24 %)                         | 23                 |
| Neighbour                                       | 5 (14 %)                         | 15                 |
| Nurse/Health officer/Doctor                     | 13 (35 %)                        | 41                 |

Note: \* Non-response adjusted sampling weight

## 321 Maternal Deaths

322 Table 5 shows causes, time and place of maternal deaths. We registered 10602 LB and 48  
323 maternal deaths yielding the overall MMR of 419 (95% CI: 260-577) per 100,000 LB. In addition  
324 there were 7 late maternal deaths. Haemorrhage was the most common 21(41%) direct cause  
325 of maternal deaths followed by eclampsia 10 (27%). Direct obstetric causes were responsible  
326 for 89 % of the deaths while indirect obstetric causes accounted for 11 %. Thirty (59%) mothers  
327 had died during labour or with 24 hours after delivery. Twenty-five (47%) mothers died at home  
328 while 17 (38%) died at a health facility

329

330

331

332

333

334

335

336

337

338

339

340 **Table 5.** Causes, time and place of maternal deaths, Sidama Regional State, southern  
 341 Ethiopia, 2020.

| Causes of death               | Unweighted Number, (%) | Weighted* % |
|-------------------------------|------------------------|-------------|
| All deaths                    | 48 (100)               |             |
| Direct obstetric causes       |                        |             |
| Haemorrhage                   | 21 (44)                | 41          |
| Eclampsia                     | 10 (21)                | 27          |
| Obstructed labour             | 8 (17)                 | 14          |
| Retained placenta             | 3 (6)                  | 6           |
| Sepsis                        | 1 (2)                  | 0.9         |
| Indirect obstetric Causes     |                        |             |
| Tuberculosis                  | 2 (4)                  | 5           |
| Malaria                       | 1 (2)                  | 3           |
| Diabetic Mellitus             | 1 (2)                  | 2.          |
| Others**                      | 1 (2)                  | 0.9         |
| Time of death (N=48)          |                        |             |
| While pregnant                | 7 (15)                 | 20          |
| During labour                 | 4 (8)                  | 6           |
| Within 24 hour after delivery | 26 (54)                | 53          |
| Within 6 weeks after delivery | 11 (23)                | 21          |
| Palace of death (N=48)        |                        |             |
| At home                       | 25 (52)                | 47          |
| On the way to health facility | 6 (13)                 | 15          |
| In health facility            | 17 (35)                | 38          |

Notes: \* Non-response adjusted sampling weight, \*\* Others include Leukaemia

342

### 343 Variations of maternal mortality ratio

344 Table 6 shows the maternal mortality ratio by districts. Aroresa district had the highest MMR:  
 345 1142; 95% CI: 693-1591 per 100000. The three districts with the highest MMR in deceasing  
 346 order were Aroresa, Daela and Aleta Wondo. The MMR in Aroresa district was 10 times higher  
 347 to Hawassa Zuriya district and 4 times higher to Wondogenet district. Similarly the MMR in

348 Daela district was 5 fold to Hawassa Zuriya district and more than double to Wondogenet  
 349 district.

350 **Table 6.** Maternal mortality ratio by district, Sidama Regional State, southern Ethiopia,  
 351 2020.

| Woreda          | Livebirths | Maternal deaths | Unweighted |          | Weighted* |          |
|-----------------|------------|-----------------|------------|----------|-----------|----------|
|                 |            |                 | MMR        | 95% CI   | MMR       | 95% CI   |
| Aleta Chuko     | 2265       | 5               | 221        | 27-414   | 263       | 58-467   |
| Aleta Wondo     | 2285       | 12              | 525        | 229-822  | 525       | 207-842  |
| Aroresa         | 1694       | 21              | 1240       | 711-1768 | 1142      | 693-1591 |
| Daela           | 716        | 4               | 559        | 11-1106  | 641       | 77-1358  |
| Hawassa Zuriya  | 2237       | 2               | 89         | 35-213   | 114       | 24-251   |
| Wondogenet      | 1405       | 4               | 285        | 5-564    | 258       | 8-508    |
| Over all Sidama | 10602      | 48              | 453        | 325-581  | 419       | 260-577  |

Note: \*: Non-response adjusted sampling weight. Abbreviations; CI: Confidence interval, MMR: Maternal mortality ratio per 100000 live born

352

### 353 Factors associated with maternal mortality

354 Table 7 shows results of complex sample logistic regression analysis of risk factors for maternal  
 355 deaths. The risk of maternal death was higher among mothers without formal education than  
 356 among those with education (AOR 4.3; 95% CI 2.0 – 9.2). Also, the risk was higher in districts  
 357 with low midwife-to-population ratio than those with high (AOR 3.0; 95% CI 1.2-7.9)

358

359 **Table 7.** Complex sample logistic regression analysis for factors associated with  
 360 maternal mortality, Sidama Regional State, southern Ethiopia, 2020.

|                                   | Participants | Deaths | Crude OR       | Logistic Regression | Complex Sample Logistic Regression |
|-----------------------------------|--------------|--------|----------------|---------------------|------------------------------------|
| All participants                  | 8755         | 48     |                |                     |                                    |
| Mother education                  |              |        | COR (95% CI)   | AOR (95% CI)        | AOR (95% CI)                       |
| Had formal education              | 6451         | 18     | 1              | 1                   | 1                                  |
| No formal education               | 2304         | 30     | 4.7 (2.6-8.5)  | 3.4 (1.7-7.0)       | 4.3 (2.0-9.2)                      |
| Husband education                 |              |        |                |                     |                                    |
| Had formal education              | 7288         | 31     | 1              | 1                   | 1                                  |
| No formal education               | 1467         | 17     | 2.7 (1.5-5.0)  | 1.0 (0.5-2.1)       | 0.9 (0.4-1.9)                      |
| Main occupation of household head |              |        |                |                     |                                    |
| Not farming**                     | 2423         | 8      | 1              | 1                   | 1                                  |
| Farming                           | 6332         | 40     | 1.9 (0.9-4.1)  | 1.4 (0.6-3.1)       | 1.5 (0.7-3.4)                      |
| Family size                       |              |        |                |                     |                                    |
| <=4                               | 3958         | 15     | 1              | 1                   | 1                                  |
| >=5                               | 4797         | 33     | 1.8 (1.0-3.4)  | 1.1 (0.6-2.2)       | 1.3 (0.7-2.5)                      |
| Number of births in five year     |              |        |                |                     |                                    |
| <=2                               | 8603         | 46     | 1              | 1                   | 1                                  |
| >=3                               | 152          | 2      | 2.5 (0.6-10.3) | 1.9 (0.4-8.1)       | 1.9 (0.4-7.8.1)                    |
| Wealth index household            |              |        |                |                     |                                    |
| Rich                              | 5245         | 27     | 1              | 1                   | 1                                  |
| Poor                              | 3510         | 21     | 1.2 (0.6-2.1)  | 1.4 (0.8-2.5)       | 1.3 (0.6-2.8)                      |
| Distance to the nearest HC        |              |        |                |                     |                                    |
| <=4.9Km                           | 8050         | 41     | 1              | 1                   | 1                                  |
| >=5Km                             | 705          | 7      | 1.9 (0.9-4.4)  | 1.7 (0.7-4.2)       | 2.1 (0.6-7.2)                      |
| Distance to the nearest HO        |              |        |                |                     |                                    |
| <=9.9Km                           | 6440         | 31     | 1              | 1                   | 1                                  |
| >=10Km                            | 2315         | 17     | 1.5 (0.8-2.8)  | 1.0 (0.4-2.2)       | 1.0 (0.4-2.4)                      |
| Hospital to population ratio      |              |        |                |                     |                                    |
| Standard or above (>=1)           | 1305         | 21     | 1              | 1                   | 1                                  |
| Below standard (<1)               | 7450         | 27     | 0.6 (0.4-1.1)  | 0.6 (0.2-1.5)       | 0.7 (0.3-2.0)                      |
| Doctor to population ratio        |              |        |                |                     |                                    |
| Above mean (>0.4)                 | 3950         | 14     | 1              | 1                   | 1                                  |
| Mean and below (<=0.4)            | 4805         | 34     | 2.0 (1.1-3.7)  | 1.1 (0.4-2.8)       | 1.1 (0.4-3.0)                      |
| Midwife to population ratio       |              |        |                |                     |                                    |
| Above mean (>0.5)                 | 3941         | 7      | 1              | 1                   | 1                                  |
| Mean and below (<=0.5)            | 4814         | 41     | 4.8 (2.2-10.8) | 3.4 (1.3-9.0)       | 3.0 (1.2-7.9)                      |

Note: \* Non-response adjusted sampling weight, \*\*Includes small scale trade and government employed, AOR: Adjusted odds ratio, CI: Confidence interval. COR: Crude odds ratio, HC: Health Centre, HO: Hospital, OR: Odds ratio



## 361 Discussion

### 362 Principal findings

363 In a population-based survey in the Sidama Regional State, southern Ethiopia, we found an  
364 overall MMR of 419 per 100,000 LB with great variation by district. The most remote districts  
365 far from the central city, with poor infrastructure and inadequate skilled health personnel had  
366 the highest maternal mortality ratio compared to those districts found nearer to the central  
367 city, with good infrastructure and adequate skilled health personnel. Haemorrhage and  
368 eclampsia were the leading causes of deaths. Nearly half of maternal deaths occurred at home  
369 and about two fifth in health facilities. The risk of maternal death was high among mothers who  
370 had no formal education and in districts which had low midwife to population ratio.

### 371 Strengths and weaknesses of the study

372 To the best of our knowledge, this is the first population based study describing maternal  
373 mortality estimate with district level variations in Sidama Regional State, southern Ethiopia  
374 using large and representative sample. We used data collectors recruited from the study area  
375 that enhanced understanding and trustworthy communication with the study population. Each  
376 maternal death was independently reviewed by two public health officers using standard VA  
377 guidelines which improved precise assignment of cause of maternal deaths. To account for the  
378 multi-stage cluster sampling technique employed for the study, we used survey data analysis  
379 methods which improved precision of the estimates.

380 This study had some limitations. We studied maternal deaths that occurred in past five year,  
381 hence, recall bias and underreporting were important limitations of this study. However, to  
382 minimize recall bias, we used local calendar and events, that helped the respondents recognize  
383 the time of maternal death. Secondly we employed data collectors who were familiar with the  
384 study setting and who took part in social events who supported the respondents to recall the  
385 death of mothers. In spite of our efforts to circumvent recall bias, there might be some  
386 maternal deaths not reported.

387 Misclassification could be another limitation for this study. Unlike medically certified deaths,  
388 our conclusion on causes of maternal deaths was based on lay family member report which is  
389 liable to misclassification. The following measures were taken to reduce misclassification.  
390 Firstly, we used two independent VA interviewers to ascertain cause of maternal deaths.  
391 Secondly, in case of lack of consensus between the two interviewers, we used third VA  
392 interviewer. Thirdly, when we did not get clear information from the first interviewee, we  
393 interviewed more than one family member.

394 We did not ask about deaths that occurred during early pregnancy due to ectopic pregnancy or  
395 abortion. Data on deaths of teenage pregnancy and deaths in women who were not in a marital  
396 union might have been missed and would lead to underreporting of maternal deaths.

397 We lack some data on health system and other factors that might have contributed for  
398 variations of maternal deaths in the study districts. Due to resource limitation, we did not use  
399 software assisted VA algorithms and expert panel of obstetrician to ascertain the deaths.

400 However, we provided adequate training for VA interviewers, pilot tested the questionnaire  
401 and the VA interviews were conducted by two independent interviewers.

## 402 **Magnitude and district level variations of maternal mortality**

403 This study identified the overall MMR 419 per 100,000 LB. Our finding is in agreement with  
404 previous MMR estimates in Ethiopia [4, 17, 34]. However; its higher than the 2017 global  
405 average, 211 per 100,000 LB [4]. To achieve the SDG, countries must reduce their MMRs by at  
406 least 6% each year between 2016 and 2030; in Ethiopia between 2000 and 2017 the annual  
407 rate of MMR reduction was 5.5% [4].

408 We observed a very high MMR in Aroresa district. Similar finding has been reported from a  
409 study in Tigray region, northern Ethiopia [18]. Provincial differences in MMR has also been  
410 reported from other African country [35]. Low utilization rate of maternal health services might  
411 have contributed for the high number of maternal deaths in the district. For instance, a study  
412 by Limaso et al. documented that in 2018 the coverage of institutional delivery for Aroresa  
413 district as reported from the district health office was 38% [36]. Aroresa district is the most  
414 remote district in the region situated 181 Km distant from the regional capital, 181 km [36];  
415 most of the kebeles in this district have difficult topography and poor road conditions, where  
416 health facilities were hard to reach. Weak referral system and lack of emergency transportation  
417 might have contributed for the high MMR in the district. Aroresa district had the lowest  
418 midwife-to-population ratio among the 6 districts included in the study. Remoteness, distance  
419 of health facilities from households and lack of adequate and skilled health personnel are  
420 known risk factors for maternal death [37].

## 421 Time, cause and place of maternal mortality

422 In our study we found that about 60% of maternal deaths occurred during labour or within 24  
423 hours postpartum. This finding is in agreement with a study conducted in eastern part of  
424 Ethiopia where 55.6% of maternal deaths were reported to occur within the first day [38]. The  
425 time around labour and the first 24 hour postpartum is a critical period that a mother should  
426 get emergency obstetric care at health facility.

427 Haemorrhage and hypertensive disorder of pregnancy accounted for majority of the deaths.  
428 This is in agreement with the findings that have been reported from Ethiopia and elsewhere  
429 [38-41]. Recent studies have indicated that the prevalence of post-partum haemorrhage in  
430 Ethiopia ranges 7.6% to 16.6% [42, 43] and hypertensive disorders of pregnancy (pre-  
431 eclampsia/eclampsia) 2-3% to 12.4% [44-46].

432 We observed that around 50% of maternal deaths occurred at home. This is in agreement with  
433 the study reported from eastern part of Ethiopia where 56 % maternal deaths were found to  
434 occur at home [38]. The high proportion of maternal deaths that occurred at home could be  
435 associated with the low coverage of skilled birth attendant which we observed in the study  
436 area. Home deaths might be reflection of poor access to emergency obstetric care.

437 In this study we found significant number of maternal deaths occurred in health facilities. A  
438 study from eastern part of Ethiopia found similar finding [38]. An Indonesian study  
439 documented that mothers who received inadequate care at health facility were more prone to  
440 death than those survived from severe obstetric complications [47]. Poor and inadequate

441 emergency obstetric at health facilities might have contributed for the deaths occurred at  
442 health facilities [48-50].

### 443 **Skilled delivery**

444 This study found that more than half of the births took place at home assisted by either TBA,  
445 family or neighbours. Studies documented that community trust on TBA, lack of transportation  
446 and poor quality of maternal health services were associated with low utilization of maternal  
447 health services [51]. It has been reported skilled assistance at delivery associated with less  
448 maternal deaths [52, 53].

### 449 **Independent predictors of maternal mortality**

450 Mothers with no formal education had increased risk of maternal death. A study conducted in  
451 eastern part of Ethiopian showed that around 84 % deceased mothers were illiterate [38]. The  
452 association of low education level with severe maternal outcomes has been documented [54].  
453 A multi-country study showed mothers with no education had 2.7 times higher risk of mortality  
454 than mothers with high education [55]. Educated women better utilize maternal health services  
455 [56, 57] and recognize pregnancy complications, prepare for births and obstetric emergencies  
456 [58].

457 In this study, we observed that there was increased risk of maternal mortality in districts which  
458 had inadequate number of midwives compared with districts which had adequate number of  
459 midwives. It has been documented that availability of skilled midwives at health facilities  
460 increases the uptake of institutional deliveries and other maternal health services [59] and  
461 consequently reduce the maternal mortality [14, 60]. In contrary to this; lack of skilled

462 personnel for maternal health services increases the risk of maternal deaths. An Indonesian  
463 study documented that lack of adequate number of doctors working at community health  
464 centre and village was associated with high maternal mortality [37].

465 Some studies indicated low wealth status is associated with increased risk of maternal deaths  
466 [61]. However, in this study we did not see association of wealth status with maternal death.  
467 Similar finding has been reported by a study from southwest Ethiopia [17]. Lack of association  
468 of wealth status with maternal deaths could be explained by maternal death is rare event in  
469 terms of absolute number.

## 470 **Policy and clinical implications**

471 This study from Sidama Regional State highlights that Ethiopia needs more regional studies to  
472 address high maternal mortality rates in the country. The high MMR with significant district  
473 level variations in this study indicate there is a need to amplify the efforts to decrease maternal  
474 deaths, identify risk factors and institute interventions tailored to areas with high maternal  
475 mortality in the region. Similar to other studies, haemorrhage was the leading cause of  
476 maternal deaths in the region. This highlights the importance of improving the skill and practice  
477 of health workers in active management of third stage of labour. The Sidama Regional Health  
478 Bureau as well as Ministry of Health should also consider inclusion of misoprostol provision to  
479 postpartum bleeding with the health extension packages for women who give birth without a  
480 skilled provider [62, 63]. Comprehensive emergency obstetric care including blood transfusion  
481 services should be available within the reach of community.

482 The high number of deaths attributable to hypertensive disorders of pregnancy in this rural  
483 community indicates the necessity of improving screening and detection of preeclampsia at  
484 community level using the health extension workers [64]. Referral system and management of  
485 preeclampsia/eclampsia has to be strengthened in the region.

486 In our study many maternal deaths occurred at home without skilled birth attendants which  
487 shows the need for strengthening access to emergency obstetric care. Evidences from rural  
488 settings of Ethiopia showed that interventions focused on strengthening emergency obstetric  
489 care improved the uptake of maternal health services and decreased the maternal mortality  
490 [15]. During ANC visits, pregnant women should be counselled and encouraged for skilled birth  
491 attendant. Avoiding barriers to skilled delivery and integrating the services of TBA with formal  
492 health system may increase use of skilled birth attendants [65].

493 The occurrence of significant number of maternal deaths at health facility signals the  
494 importance of improving emergency obstetric care in health facilities [50, 66]. The association  
495 of inadequate number of midwives with maternal mortality indicates the Ministry of Health and  
496 the Sidama Regional Health Bureau should train and deploy adequate number of midwives so  
497 that quality maternal health services are provided and consequently maternal deaths averted.  
498 Increased risk of maternal deaths among mothers who did not have formal education indicates  
499 there is a need to improve educational status of female in the region.

## 500 Conclusion

501 This study found high MMR in rural areas of Sidama Regional State with high variations in the  
502 districts. The study highlights that Ethiopia needs regional studies to understand magnitude of

503 maternal mortality and local variations in order to reduce the high maternal deaths. The quality  
504 of emergency obstetric care including lifesaving interventions have to be improved in the  
505 region. Sidama Regional Health Bureau should design maternal health interventions targeting  
506 local variations and areas with high mortality rates. The shortage of midwives should be  
507 alleviated to improve provision of skilled maternal health services and consequently save the  
508 life of mothers.

## 509 Supporting information

510 **S1 Table. Variables included in Principal Component Analysis for household wealth**  
511 **index creation, Sidama Regional State, southern Ethiopia, 2020.**

512 **(XLS)**

513

## 514 Acknowledgement

515 We would like to thank participants of the study for their time and information. Our special  
516 thanks go to Sidama Regional Health Bureau, respective district health offices and *kebele*  
517 administrations in Ethiopia for their support and permission to conduct the study. We are  
518 grateful to data clerks for their patience and time while dealing with big data without  
519 compromising its quality.

## 520 Author contribution

521 AZK, BL and SGH conceived and designed the experiments. AZK, BL and SGH performed the  
522 experiments. AZK analysed the data. BL, AGT and SGH supervised and provided mentorship.



523 AZK drafted the article. All authors contributed to the writing, reviewed the article and  
524 approved the final version of the manuscript.

525

## 526 References

- 527 1. World Bank. World Development Indicators data base. 2021.
- 528 2. Ministry of Health- Ethiopia. Health Sector Transformation Plan II (HSTP II), 2020-2025. 2021.
- 529 3. Central Statistical Agency Ethiopia:The DHS Program ICF Rockville Maryland, USA. Demographic  
530 and Health Survey 2016 Final Report. 2017.
- 531 4. WHO, UNICEF, UNFPA, BANK W, UNPD. Trends in Maternal Mortality:2000-2017. WHO, UNICEF,  
532 UNFPA, UNDP and The World Bank estimates. 2019.
- 533 5. WHO. Strategies towards ending preventable maternal mortality (EPMM). 2015.
- 534 6. Sustainable Development Goals. Every Woman, Every Child: The Global Strategy for Women’s,  
535 Children’s and Adolescents’ Health, (2016-2030). 2015.
- 536 7. Samuel Mills, Carla Abouzahr, Jane Kim, Bahie M. Rassekh, Deborah Sarpong; The World Bank  
537 Group. Civil registration and vital statistics for monitoring the sustainable development goals.  
538 2017.
- 539 8. Abay ST, Gebre-Egziabher AG. Status and associated factors of birth registration in selected  
540 districts of Tigray region, Ethiopia. BMC Int Health Hum Rights.2020; 20(20). doi:  
541 [10.1186/s1291402000235-x](https://doi.org/10.1186/s1291402000235-x) PMID: [32727474](https://pubmed.ncbi.nlm.nih.gov/32727474/)
- 542 9. Malqvist M, Eriksson L, Nguyen TN, Fagerland LI, Dinh PH, Wallin L, et al. Unreported births and  
543 deaths, a severe obstacle for improved neonatal survival in low-income countries; a population  
544 based study. BMC Int Health Hum Rights. 2008;8 (4). doi: [10.1186/1472-698X-8-4](https://doi.org/10.1186/1472-698X-8-4) PMID:  
545 [18373839](https://pubmed.ncbi.nlm.nih.gov/18373839/)
- 546 10. World BANK, World Health Organization. Global Civil Registration and Vital Statistics: Scaling up  
547 Investment Plan 2015-2024.World Bank Group. 2014.

- 548 11. WJ Graham, S Ahmed, C Stanton, CL Abou-Zahr, OMR Campbell. Measuring maternal mortality:  
549 An overview of opportunities and options for developing countries. BMC Medicine  
550 2008;6(12).doi: [10.1186/1741-7015-6-12](https://doi.org/10.1186/1741-7015-6-12) PMID: [18503716](https://pubmed.ncbi.nlm.nih.gov/18503716/)
- 551 12. Zalvand R, Tajvar M, Pourreza A, Asheghi H. Determinants and causes of maternal mortality in  
552 Iran based on ICD-MM: a systematic review. Reprod Health. 2019; 16 (16). doi: [10.1186/s12978-](https://doi.org/10.1186/s12978-019-0676-y)  
553 [019-0676-y](https://doi.org/10.1186/s12978-019-0676-y) PMID: [30736803](https://pubmed.ncbi.nlm.nih.gov/30736803/)
- 554 13. Lassi ZS, Mansoor T, Salam RA, Das JK, Bhutta ZA. Essential pre-pregnancy and pregnancy  
555 interventions for improved maternal, newborn and child health. Reprod Health.2014; 11 Suppl  
556 1:S2. doi: [10.1186/1742-4755-11-S1-S2](https://doi.org/10.1186/1742-4755-11-S1-S2) PMID: [25178042](https://pubmed.ncbi.nlm.nih.gov/25178042/)
- 557 14. Chowdhury ME, Ahmed A, Kalim N, Koblinsky M. Causes of maternal mortality decline in Matlab,  
558 Bangladesh. J Health Popul Nutr. 2009;27(2):108-23. doi: [10.3329/jhpn.v27i2.3325](https://doi.org/10.3329/jhpn.v27i2.3325) PMID:  
559 [19489410](https://pubmed.ncbi.nlm.nih.gov/19489410/)
- 560 15. Lindtjorn B, Mitiku D, Zidda Z, Yaya Y. Reducing Maternal Deaths in Ethiopia: Results of an  
561 Intervention Programme in Southwest Ethiopia. PLoS One.2017; 12(1):e0169304. doi:  
562 [10.1371/journal.pone.0169304](https://doi.org/10.1371/journal.pone.0169304) PMID: [28046036](https://pubmed.ncbi.nlm.nih.gov/28046036/)
- 563 16. Countdown to 2030: tracking progress towards universal coverage for reproductive, maternal,  
564 newborn, and child health. Lancet. 2018. doi: [10.1016/S0140-6736\(18\)30104-1](https://doi.org/10.1016/S0140-6736(18)30104-1) PMID: [29395268](https://pubmed.ncbi.nlm.nih.gov/29395268/)
- 565 17. Yaya Y, Eide KT, Norheim OF, Lindtjorn B. Maternal and neonatal mortality in south-west  
566 Ethiopia: estimates and socio-economic inequality. PLoS One. 2014; 9(4):e96294.doi:  
567 [10.1371/journal.pone.0096294](https://doi.org/10.1371/journal.pone.0096294) PMID: [24787694](https://pubmed.ncbi.nlm.nih.gov/24787694/)
- 568 18. Godefay H, Byass P, Kinsman J, Mulugeta A. Understanding maternal mortality from top-down  
569 and bottom-up perspectives: Case of Tigray Region, Ethiopia. J Glob Health.2015; 5(1):010404.  
570 doi: [10.7189/jogh.05.010404](https://doi.org/10.7189/jogh.05.010404) PMID: [25674351](https://pubmed.ncbi.nlm.nih.gov/25674351/)

- 571 19. Federal Democratic Republic of Ethiopia Population Census Commission:. Summary and  
572 Statistical Report of the 2007 Population and Housing Census: Addis Ababa. 2008.
- 573 20. Kare AP, Gujo AB, Yote NY. Quality of antenatal care and associated factors among pregnant  
574 women attending government hospitals in Sidama Region, Southern Ethiopia. SAGE Open  
575 Med.2021; 9. doi: [10.1177/20503121211058055](https://doi.org/10.1177/20503121211058055) PMID: [34868590](https://pubmed.ncbi.nlm.nih.gov/34868590/)
- 576 21. Mirkuzie AH, Sisay MM, Reta AT, Bedane MM. Current evidence on basic emergency obstetric  
577 and newborn care services in Addis Ababa, Ethiopia; a cross sectional study. BMC Pregnancy  
578 Childbirth. 2014;14(354). doi: [10.1186/1471-2393-14-354](https://doi.org/10.1186/1471-2393-14-354) PMID: [25300789](https://pubmed.ncbi.nlm.nih.gov/25300789/)
- 579 22. WHO. The WHO Application of ICD-10 to deaths during pregnancy, childbirth and the  
580 puerperium: ICD-MM. 2012.
- 581 23. WHO. Standards and reporting requirements related for maternal mortality. ICD-11  
582 Reference guide, Part 2. 2019.
- 583 24. WHO. Beyond the numbers: reviewing maternal deaths and complications to make pregnancy  
584 safer. 2004.
- 585 25. WHO. Verbal autopsy standards: Ascertaining and attributing causes of death. 2007.
- 586 26. Landis JR, Koch GG. The measurement of observer agreement for categorical data. Biometrics.  
587 1977;33(1):159-74. PMID: [843571](https://pubmed.ncbi.nlm.nih.gov/843571/)
- 588 27. Dean AG, Sullivan KM, Soe MM. OpenEpi: Open Source Epidemiologic Statistics for Public  
589 Health, Version 3.01.
- 590 28. Hahs-Vaughn DL, McWayne CM, Bulotsky-Shearer RJ, Wen X, Faria AM. Methodological  
591 considerations in using complex survey data: an applied example with the Head Start Family and

- 592 Child Experiences Survey. Eval Rev.2011; 35(3):269-303. doi: [10.1177/0193841X11412071](https://doi.org/10.1177/0193841X11412071) PMID:  
593 [21917712](https://pubmed.ncbi.nlm.nih.gov/21917712/)
- 594 29. Tetteh J, Nuertey BD, Dwomoh D, Udofia EA, Mohammed S, Adjei-Mensah E, et al. Teenage  
595 pregnancy and experience of physical violence among women aged 15-19 years in five African  
596 countries: Analysis of complex survey data. PLoS One.2020; 15(10):e0241348. doi:  
597 [10.1371/journal.pone.0241348](https://doi.org/10.1371/journal.pone.0241348) PMID: [33108400](https://pubmed.ncbi.nlm.nih.gov/33108400/)
- 598 30. David Haziza, Jean-François Beaumont. Construction of weights in surveys: A review. Statistical  
599 Science. 2017;32(2):206-26. doi: [10.1214/16-STS608](https://doi.org/10.1214/16-STS608)
- 600 31. Graham Kalton. Introduction to survey sampling: Series: Quantitative applications in the social  
601 sciences. Sara Miller McCune, Sage Publications, Inc. 1983.
- 602 32. Knaub J. Finite population correction (FPC) factor: Encyclopaedia of survey research methods.  
603 SAGE publications, Inc. 2008:284-6.
- 604 33. ESRI (2011) ArcGIS Desktop: Release 10. Environmental Systems Research Institute, Redlands,.
- 605 34. Central Statistical Authority Addis Ababa E, ICF International C, Maryland, USA,. Ethiopia  
606 Demographic and Health Survey 2011. 2012.
- 607 35. Bomela NJ. Maternal mortality by socio-demographic characteristics and cause of death in  
608 South Africa: 2007-2015. BMC Public Health.2020; 20(157). doi: [10.1186/s12889-020-8179-x](https://doi.org/10.1186/s12889-020-8179-x)  
609 PMID: [32007100](https://pubmed.ncbi.nlm.nih.gov/32007100/)
- 610 36. Limaso AA, Dangisso MH, Hibstu DT. Neonatal survival and determinants of mortality in Aroresa  
611 district, Southern Ethiopia: a prospective cohort study. BMC Pediatr.2020; 20(33). doi:  
612 [10.1186/s12887-019-1907-7](https://doi.org/10.1186/s12887-019-1907-7) PMID: [31987037](https://pubmed.ncbi.nlm.nih.gov/31987037/)

- 613 37. Cameron L, Contreras Suarez D, Cornwell K. Understanding the determinants of maternal  
614 mortality: An observational study using the Indonesian Population Census. PLoS  
615 One.2019;14(6):e0217386. doi: [10.1371/journal.pone.0217386](https://doi.org/10.1371/journal.pone.0217386) PMID: [31158243](https://pubmed.ncbi.nlm.nih.gov/31158243/)
- 616 38. Tesfaye G, Loxton D, Chojenta C, Assefa N, Smith R. Magnitude, trends and causes of maternal  
617 mortality among reproductive aged women in Kersa health and demographic surveillance  
618 system, eastern Ethiopia. BMC Womens Health. 2018; 18(198). doi: [10.1186/s12905-018-0690-1](https://doi.org/10.1186/s12905-018-0690-1)  
619 PMID: [30518368](https://pubmed.ncbi.nlm.nih.gov/30518368/)
- 620 39. Legesse T, Abdulahi M, Dirar A. Trends and causes of maternal mortality in Jimma University  
621 Specialized Hospital, southwest Ethiopia: a matched case-control study. Int J Womens  
622 Health.2017; 9:307-13. doi: [10.2147/IJWH.S123455](https://doi.org/10.2147/IJWH.S123455) PMID: [28496370](https://pubmed.ncbi.nlm.nih.gov/28496370/)
- 623 40. Sageer R, Kongnyuy E, Adebimpe WO, Omosehin O, Ogunsola EA, Sanni B. Causes and  
624 contributory factors of maternal mortality: evidence from maternal and perinatal death  
625 surveillance and response in Ogun state, Southwest Nigeria. BMC Pregnancy Childbirth.2019;  
626 19(63). doi: [10.1186/s12884-019-2202-1](https://doi.org/10.1186/s12884-019-2202-1) PMID: [30744576](https://pubmed.ncbi.nlm.nih.gov/30744576/)
- 627 41. Bwana VM, Rumisha SF, Mremi IR, Lyimo EP, Mboera LEG. Patterns and causes of hospital  
628 maternal mortality in Tanzania: A 10-year retrospective analysis. PLoS One.  
629 2019;14(4):e0214807. doi: [10.1371/journal.pone.0214807](https://doi.org/10.1371/journal.pone.0214807) PMID: [30964909](https://pubmed.ncbi.nlm.nih.gov/30964909/)
- 630 42. Habitamu D, Goshu YA, Zeleke LB. The magnitude and associated factors of postpartum  
631 hemorrhage among mothers who delivered at Debre Tabor general hospital 2018. BMC Res  
632 Notes.2019; 12(618). doi: [10.1186/s13104-019-4646-9](https://doi.org/10.1186/s13104-019-4646-9) PMID: [31547856](https://pubmed.ncbi.nlm.nih.gov/31547856/)
- 633 43. Kebede BA, Abdo RA, Anshebo AA, Gebremariam BM. Prevalence and predictors of primary  
634 postpartum hemorrhage: An implication for designing effective intervention at selected

- 635 hospitals, Southern Ethiopia. PLoS One. 2019;14(10):e0224579. doi:  
636 [10.1371/journal.pone.0224579](https://doi.org/10.1371/journal.pone.0224579) PMID: [31671143](https://pubmed.ncbi.nlm.nih.gov/31671143/)
- 637 44. Vata PK, Chauhan NM, Nallathambi A, Hussein F. Assessment of prevalence of preeclampsia  
638 from Dilla region of Ethiopia. BMC Res Notes.2015; 8(816). doi: [10.1186/s13104-015-1821-5](https://doi.org/10.1186/s13104-015-1821-5)  
639 PMID: [26704295](https://pubmed.ncbi.nlm.nih.gov/26704295/)
- 640 45. Wassie AY, Anmut W. Prevalence of Eclampsia and Its Maternal-Fetal Outcomes at Gandhi  
641 Memorial Hospital, Addis Ababa Ethiopia, 2019: Retrospective Study. Int J Womens  
642 Health.13:231-7. doi: [10.2147/IJWH.S298463](https://doi.org/10.2147/IJWH.S298463) PMID: [33654436](https://pubmed.ncbi.nlm.nih.gov/33654436/)
- 643 46. Belay AS, Wudad T. Prevalence and associated factors of pre-eclampsia among pregnant women  
644 attending anti-natal care at Mettu Karl referral hospital, Ethiopia: cross-sectional study. Clin  
645 Hypertens.2019; 25(14). doi: [10.1186/s40885-019-0120-1](https://doi.org/10.1186/s40885-019-0120-1) PMID: [31304042](https://pubmed.ncbi.nlm.nih.gov/31304042/)
- 646 47. Mawarti Y, Utarini A, Hakimi M. Maternal care quality in near miss and maternal mortality in an  
647 academic public tertiary hospital in Yogyakarta, Indonesia: a retrospective cohort study. BMC  
648 Pregnancy Childbirth. 2017;17(149). doi: [10.1186/s12884-017-1326-4](https://doi.org/10.1186/s12884-017-1326-4) PMID: [28532393](https://pubmed.ncbi.nlm.nih.gov/28532393/)
- 649 48. Mgawadere F, Unkels R, Kazembe A, van den Broek N. Factors associated with maternal  
650 mortality in Malawi: application of the three delays model. BMC Pregnancy Childbirth. 2017;  
651 17(219). doi: [10.1186/s12884-017-1406-5](https://doi.org/10.1186/s12884-017-1406-5) PMID: [28697794](https://pubmed.ncbi.nlm.nih.gov/28697794/)
- 652 49. Assefa EM, Berhane Y. Delays in emergency obstetric referrals in Addis Ababa hospitals in  
653 Ethiopia: a facility-based, cross-sectional study. BMJ Open.2020; 10:e033771. doi:  
654 [10.1136/bmjopen-2019-033771](https://doi.org/10.1136/bmjopen-2019-033771) PMID: [32580981](https://pubmed.ncbi.nlm.nih.gov/32580981/)

- 655 50. Windsma M, Vermeiden T, Braat F, Tsegaye AM, Gaym A, van den Akker T, et al. Emergency  
656 obstetric care provision in Southern Ethiopia: a facility-based survey. *BMJ Open*.2017;  
657 7:e018459. doi: [10.1136/bmjopen-2017-018459](https://doi.org/10.1136/bmjopen-2017-018459) PMID: [29122802](https://pubmed.ncbi.nlm.nih.gov/29122802/)
- 658 51. Kea AZ, Tulloch O, Datiko DG, Theobald S, Kok MC. Exploring barriers to the use of formal  
659 maternal health services and priority areas for action in Sidama zone, southern Ethiopia. *BMC*  
660 *Pregnancy Childbirth*.2018;18(96). doi: [10.1186/s12884-018-1721-5](https://doi.org/10.1186/s12884-018-1721-5) PMID: [29649972](https://pubmed.ncbi.nlm.nih.gov/29649972/)
- 661 52. Girum T, Wasie A. Correlates of maternal mortality in developing countries: an ecological study  
662 in 82 countries. *Matern Health Neonatol Perinatol*.2017;3(19). doi: [10.1186/s40748-017-0059-8](https://doi.org/10.1186/s40748-017-0059-8)  
663 PMID: [29142757](https://pubmed.ncbi.nlm.nih.gov/29142757/)
- 664 53. Sara J, Haji Y, Gebretsadik A. Determinants of Maternal Death in a Pastoralist Area of Borena  
665 Zone, Oromia Region, Ethiopia: Unmatched Case-Control Study. *Obstet Gynecol Int*.2019. doi:  
666 [10.1155/2019/5698436](https://doi.org/10.1155/2019/5698436) PMID: [30805003](https://pubmed.ncbi.nlm.nih.gov/30805003/)
- 667 54. Tuncalp O, Souza JP, Hindin MJ, Santos CA, Oliveira TH, Vogel JP, et al. Education and severe  
668 maternal outcomes in developing countries: a multicountry cross-sectional survey.  
669 *BJOG*.2014;121 (Suppl 1):57-65. doi: [10.1111/1471-0528.12634](https://doi.org/10.1111/1471-0528.12634) PMID: [24641536](https://pubmed.ncbi.nlm.nih.gov/24641536/)
- 670 55. Karlsen S, Say L, Souza JP, Hogue CJ, Calles DL, Gulmezoglu AM, et al. The relationship between  
671 maternal education and mortality among women giving birth in health care institutions: analysis  
672 of the cross sectional WHO Global Survey on Maternal and Perinatal Health. *BMC Public*  
673 *Health*.2011;11(606). doi: [1471-2458/11/606](https://doi.org/10.1186/1471-2458/11/606) PMID: [21801399](https://pubmed.ncbi.nlm.nih.gov/21801399/)
- 674 56. Ahmed S, Creanga AA, Gillespie DG, Tsui AO. Economic status, education and empowerment:  
675 implications for maternal health service utilization in developing countries. *PLoS*  
676 *One*.2010;5(6):e111190. doi: [10.1371/journal.pone.0011190](https://doi.org/10.1371/journal.pone.0011190) PMID: [20585646](https://pubmed.ncbi.nlm.nih.gov/20585646/)



- 677 57. Wang H, Frasco E, Takesue R, Tang K. Maternal education level and maternal healthcare  
678 utilization in the Democratic Republic of the Congo: an analysis of the multiple indicator cluster  
679 survey 2017/18. BMC Health Serv Res.2021;21(850). doi: [10.1186/s12913-021-06854-x](https://doi.org/10.1186/s12913-021-06854-x) PMID:  
680 [34419033](https://pubmed.ncbi.nlm.nih.gov/34419033/)
- 681 58. Ketema DB, Leshargie CT, Kibret GD, Assemie MA, Petrucka P, Alebel A. Effects of maternal  
682 education on birth preparedness and complication readiness among Ethiopian pregnant women:  
683 a systematic review and meta-analysis. BMC Pregnancy Childbirth.2020;20(149). doi:  
684 [10.1186/s12884-020-2812-7](https://doi.org/10.1186/s12884-020-2812-7) PMID: [32143581](https://pubmed.ncbi.nlm.nih.gov/32143581/)
- 685 59. Grepin KA, Chukwuma A, Holmlund M, Vera-Hernandez M, Wang Q, Rosa-Dias P. Estimating the  
686 impact of trained midwives and upgraded health facilities on institutional delivery rates in  
687 Nigeria using a quasi-experimental study design. BMJ Open.2022;12:e053792.doi:  
688 [10.1136/bmjopen-2021-053792](https://doi.org/10.1136/bmjopen-2021-053792) PMID: [35613794](https://pubmed.ncbi.nlm.nih.gov/35613794/)
- 689 60. Wendy J Graham, Jacqueline S Bell, Colin HW Bullough. Can skilled attendance at delivery  
690 reduce maternal mortality in developing countries? Studies in HSO&P. 2001;17.
- 691 61. Jeong W, Jang SI, Park EC, Nam JY. The Effect of Socioeconomic Status on All-Cause Maternal  
692 Mortality: A Nationwide Population-Based Cohort Study. Int J Environ Res Public  
693 Health.2020;17(12). doi: [10.3390/ijerph17124606](https://doi.org/10.3390/ijerph17124606) PMID: [32604879](https://pubmed.ncbi.nlm.nih.gov/32604879/)
- 694 62. Haver J, Ansari N, Zainullah P, Kim YM, Tappis H. Misoprostol for Prevention of Postpartum  
695 Hemorrhage at Home Birth in Afghanistan: Program Expansion Experience. J Midwifery Womens  
696 Health.2016;61(2):196-202. doi: [10.1111/jmwh.12413](https://doi.org/10.1111/jmwh.12413) PMID: [26849472](https://pubmed.ncbi.nlm.nih.gov/26849472/)

- 697 63. Smith JM, Baawo SD, Subah M, Sirtor-Gbassie V, Howe CJ, Ishola G, et al. Advance distribution of  
698 misoprostol for prevention of postpartum hemorrhage (PPH) at home births in two districts of  
699 Liberia. BMC Pregnancy Childbirth.2014;14(189). doi: [1471-2393/14/189](https://doi.org/10.1186/s12913-014-0189-1) PMID: [24894566](https://pubmed.ncbi.nlm.nih.gov/24894566/)
- 700 64. Teshome DF, Balcha SA, Ayele TA, Atnafu A, Sisay M, Asfaw MG, et al. Trained health extension  
701 workers correctly identify high blood pressure in rural districts of northwest Ethiopia: a  
702 diagnostic accuracy study. BMC Health Serv Res.2022;22(375). doi: [10.1186/s12913-022-07794-](https://doi.org/10.1186/s12913-022-07794-w)  
703 [w](https://doi.org/10.1186/s12913-022-07794-w) PMID: [35317798](https://pubmed.ncbi.nlm.nih.gov/35317798/)
- 704 65. Miller T, Smith H. Establishing partnership with traditional birth attendants for improved  
705 maternal and newborn health: a review of factors influencing implementation. BMC Pregnancy  
706 Childbirth.2017;17(365). doi: [10.1186/s12884-017-1534-y](https://doi.org/10.1186/s12884-017-1534-y) PMID: [29052533](https://pubmed.ncbi.nlm.nih.gov/29052533/)
- 707 66. Ayalew Tiruneh G, Melkamu Asaye M, Solomon AA, Tiruneh Arega D. Delays during emergency  
708 obstetric care and their determinants among mothers who gave birth in South Gondar zone  
709 hospitals, Ethiopia. A cross-sectional study design. Glob Health Action.2021;14(1):1953242. doi:  
710 [10.1080/16549716.2021.1953242](https://doi.org/10.1080/16549716.2021.1953242) PMID: [34328059](https://pubmed.ncbi.nlm.nih.gov/34328059/)

711

712

713

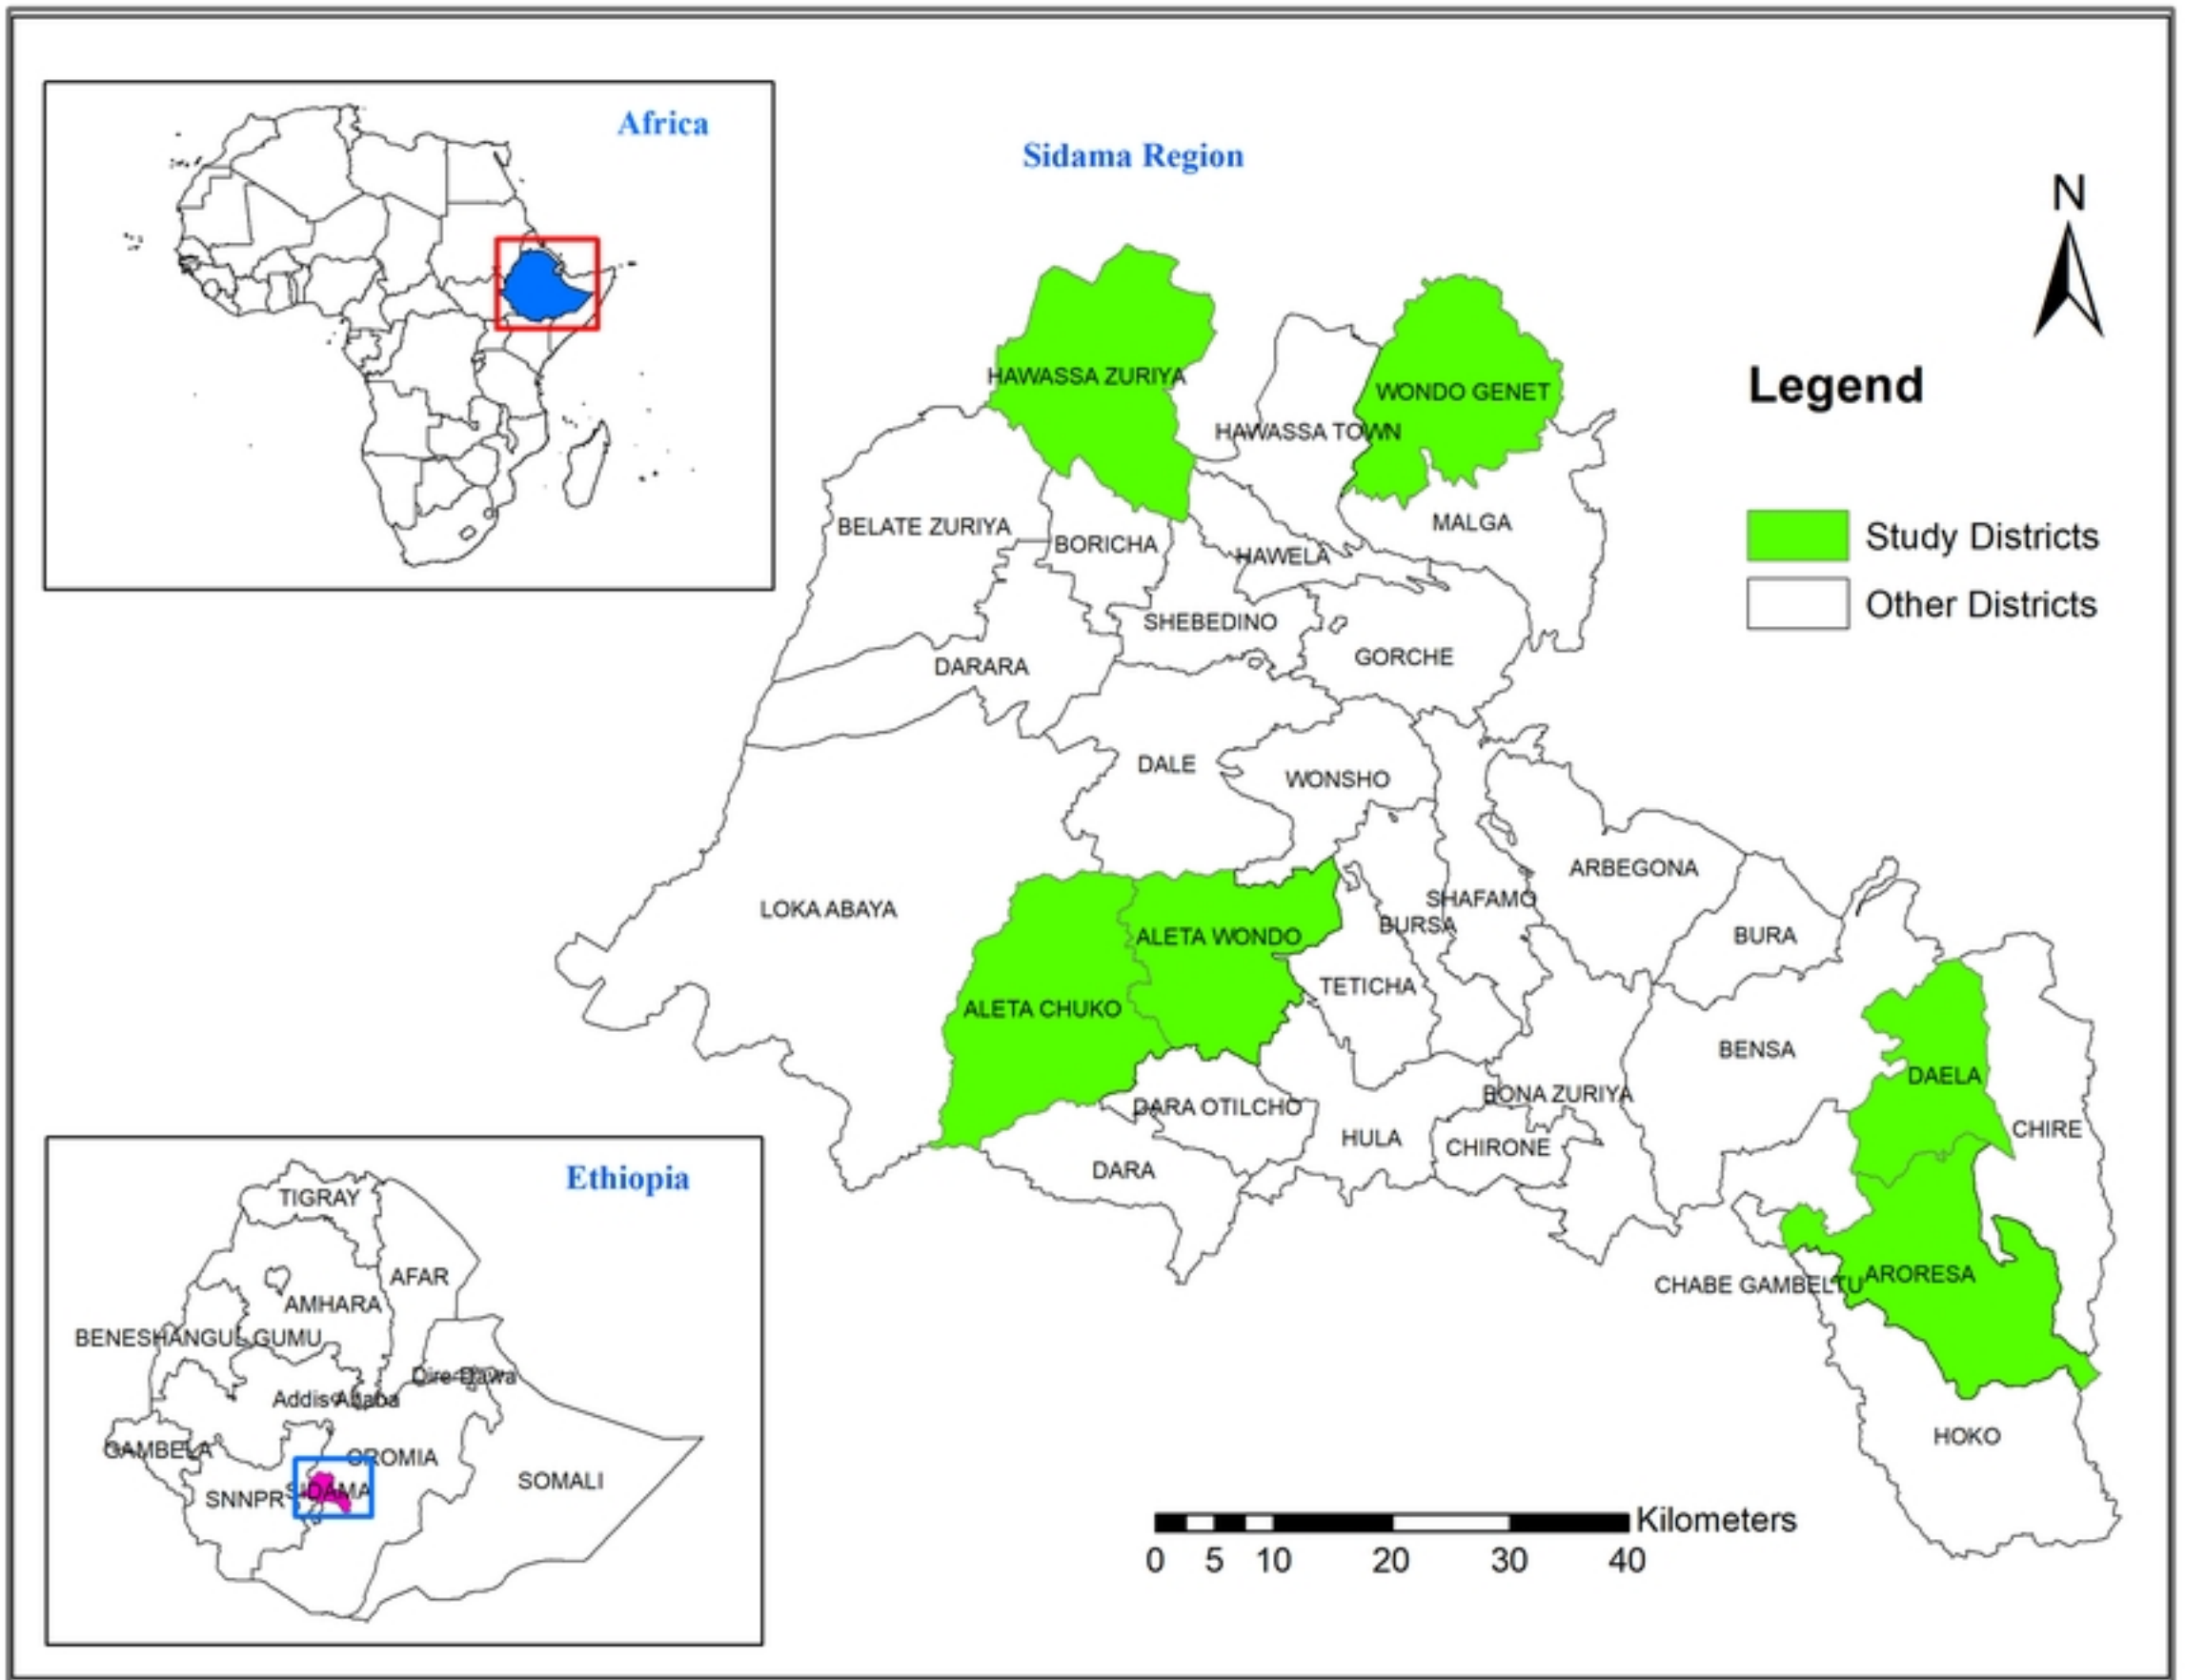

Figure

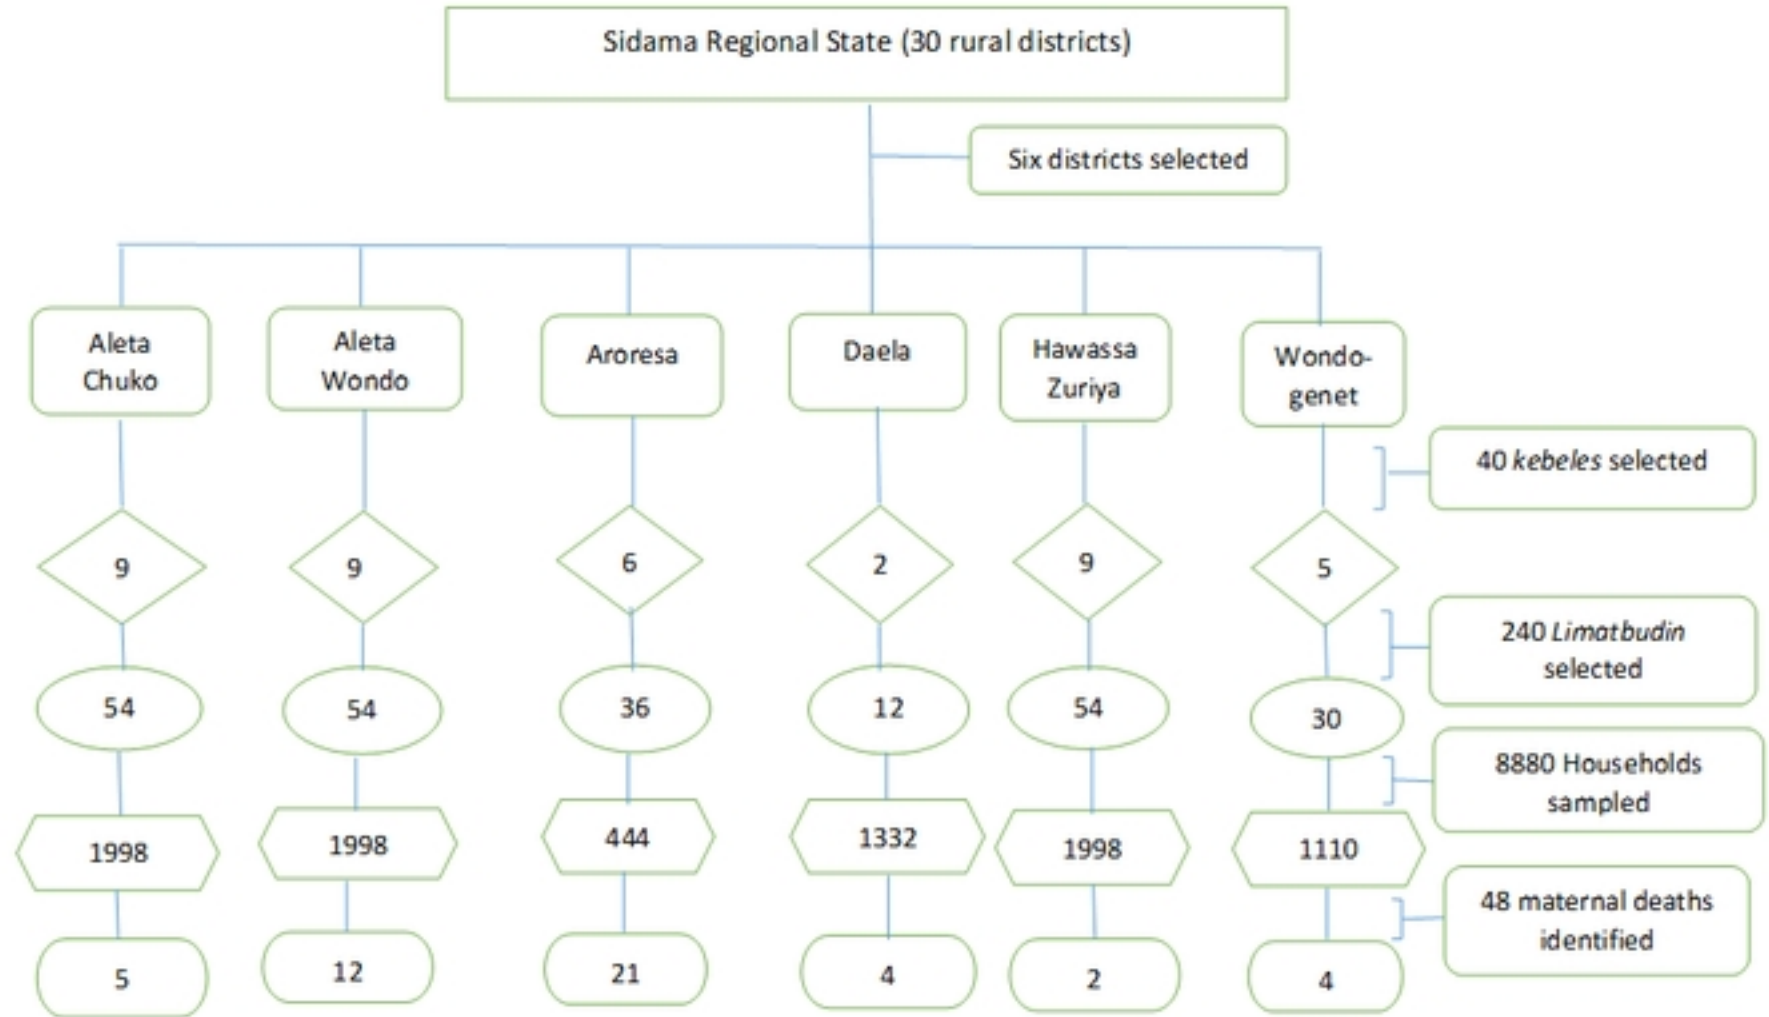

Figure
